# Supplementary material for: SLFN11 inhibits hepatocellular carcinoma tumorigenesis and metastasis by targeting RPS4X via mTOR pathway
Source: PubMed Central journal article supplement (PMC7150495; doi:10.7150/thno.42869), 2020-03-25
Supplement: thnov10p4627s1.pdf [file thnov10p4627s1.pdf]

## Supplementary Material

### **SLFN11 inhibits hepatocellular carcinoma tumorigenesis and metastasis by targeting RPS4X via mTOR pathway**

Chenhao Zhou<sup>#</sup>, Chunxiao Liu<sup>#</sup>, Wenjie Liu<sup>#</sup>, Wanyong Chen, Yirui Yin, Chia-Wei Li, Jennifer L. Hsu, Jialei Sun, Qiang Zhou, Hui Li, Bo Hu, Peiyao Fu, Manar Atyah, Qianni Ma, Yang Xu, Qiongzhu Dong<sup>\*</sup>, Mien-Chie Hung<sup>\*</sup>, and Ning Ren<sup>\*</sup>

\* Correspondence to: ren.ning@zs-hospital.sh.cn;

mhung@cmu.edu.tw;

qzhdong@fudan.edu.cn

<sup>#</sup> The authors contributed equally to this work.

#### **Supplementary Material includes:**

Supplementary Methods

Supplementary Figure S1 to Figure S6

Supplementary Table S1 to Table S5

## Supplementary Methods

### Cell transfection

The lentiviral-based small hairpin RNA (shRNA) targeting SLFN11 or RPS4X and SLFN11 overexpression lentiviruses were constructed by Hanyin Biotechnology Co., Ltd., Shanghai, China. They also provided the control lentivirus with shRNA (Control) and plasmid (Vector). HCC cells were cultured in six-well plates overnight and infected with the corresponding lentiviruses in the presence of polybrene (8 µg/ml). After the cells were infected for 24 h, the original medium was replaced by fresh 10% FBS DMEM supplemented with puromycin (3 µg/ml) for excluding noninfected HCC cells. The following experiments were performed by using the successfully selected HCC cell lines. The target sequences of sh1-SLFN11 were 5'-CAGTCTTTGAGAGAGCTTATT-3', sh2-SLFN11 was 5'-GCTCAGAATTTCCGTACTGAA-3', and shRPS4X was 5'-TGACAAGACGGGAGAGAAT-3'.

### RNA extraction and quantitative reverse transcription-polymerase chain reaction (qRT-PCR)

TRIzol reagent (Invitrogen, USA) was used to extract total RNA of frozen tissues of patients and cells enrolled in our study. Then a PrimeScript RT reagent kit (Takara, Japan) was used for the complementary DNA synthesis reactions. According to the manufacturer's protocol, SYBR<sup>®</sup> Premix ExTaq<sup>™</sup> (Takara, Japan) was used to perform the qRT-PCR in an ABI Prism 7500 Sequence Detection System (Applied Biosystems, Foster City, CA, USA). The primers designed in our study were as follows: SLFN11, forward: 5'-CCTGGTTGTGGAACCATCTT-3', and reverse: 5'-CTCTCCTTCTCTTGGTCTCTCT-3'; GAPDH, forward: 5'-CTGGGCTACTGAGCACC-3', and reverse: 5'-AAGTGGTCGTTGAGGGCAATG-3'; RPS4X, forward: 5'-AGATTTGCATGCAGCGGTTC-3', and reverse: 5'-

GGCCTCCTCAGGTGTAATACG-3'. The results were normalized to GAPDH for measuring the relative mRNA expression. Triplicate experiments were performed in each sample.

### **Western blot analysis**

Total proteins of frozen tissues and cells were extracted by using RIPA buffer (150 mM NaCl, 50 mM Tris [pH7.5], 0.1% sodium dodecyl sulfate (SDS), 1% Triton X-100, 0.5% sodium deoxycholate) supplemented with 1% protease inhibitor cocktail and phosphatase inhibitor cocktail (Bimake, Houston, TX, USA). For drug treatment assays, we treated cells with INK128 (200 nM; SelleckChem, Shanghai, China) for 48 h. Then we extracted the proteins from the cells. The proteins were then quantified by the Pierce™ BCA Protein Assay Kit (Pierce Biotechnology, Rockford, IL, USA). Total protein (20 µg) was heated for 15 min at 100 °C, then separated by SDS-polyacrylamide gel electrophoresis (SDS-PAGE) and transferred to polyvinylidene difluoride (PVDF) membranes (Millipore, Billerica, MA, USA). 5% nonfat dry milk was used to block the membranes for 1 hour at room temperature; then the corresponding primary antibodies were incubated on the membranes at 4 °C overnight. After the membranes were washed three times by Tris-buffered saline-Tween (TBST) solution, the horseradish peroxidase (HRP)-conjugated secondary antibody (Jackson ImmunoResearch, West Grove, PA, USA) with 1:5000 dilutions were incubated on the membranes at room temperature for 1 h. An enhanced chemiluminescence (ECL) assay (Pierce Biotechnology) was used for bands visualization, and the bands were then exposed to ImageQuant™ LAS 4000 (GE Healthcare, Pittsburgh, PA, USA).

### **Mouse xenograft study**

All male BALB/c nude mice (4–6 weeks of age) were purchased from the Shanghai SLAC

Laboratory Animal Co., Ltd., and raised in a standard pathogen-free (SPF) environment in the experimental animal center of Zhongshan Hospital, Fudan University. Our project was conducted under guidelines approved by the Institutional Animal Care and Ethics Committee of Zhongshan Hospital, Fudan University. For the subcutaneous mouse models,  $5 \times 10^6$  HCC cells (HCCLM3-Vector, HCCLM3-SLFN11, SMMC-7721-Control, SMMC-7721-shSLFN11) that had been suspended in 100  $\mu$ l of PBS solution were subcutaneously injected into the right flanks of the mice (6/group). The mice were monitored every day, and the subcutaneous tumors were measured by a vernier caliper twice a week. Six weeks later, all mice were euthanized. Tumor volume was calculated as follows: Tumor volume ( $\text{mm}^3$ ) = (Length  $\times$  Width<sup>2</sup>)/2. For the orthotopic mouse models, tumors from subcutaneous HCC cells (HCCLM3-Vector, HCCLM3-SLFN11, SMMC-7721-Control, SMMC-7721-shSLFN11) were cut into 1  $\text{mm}^3$  cubes and transplanted to the liver parenchyma of BALB/c nude mice that had been anesthetized with use of isoflurane. After the cells had been implanted for 1 week, the mice were randomly divided into 8 groups (HCCLM3-Vector, HCCLM3-Vector + INK128, HCCLM3-SLFN11, HCCLM3-SLFN11+ INK128, SMMC-7721-Control, SMMC-7721-Control + INK128, SMMC-7721-shSLFN11, SMMC-7721-shSLFN11+ INK128). For drug administration, INK128 was dissolved in 30% PEG400, 0.5% Tween80, and 5% propylene glycol. INK128 was administrated by oral gavage at 1 mg/kg/day. For the HCCLM3-Vector and SMMC-7721-Control group, the mice were treated via oral gavage with vehicle daily. At six weeks after transplantation, all mice were euthanized. The subcutaneous tumors or the orthotopic tumors in livers were excised, photographed, measured, and weighed. The xenograft tumors were fixed in 4% paraformaldehyde and embedded in paraffin for further IHC staining. In addition, we harvested the lung tissues of all orthotopic mouse models to evaluate the incidence of lung metastasis. They were also fixed in 4% paraformaldehyde and embedded in

paraffin. Then the embedded blocks received consecutive resection for further hematoxylin and eosin (HE) staining. Lung metastases were evaluated by two experienced pathologists.

**Supplementary Figures and Figure Legends**

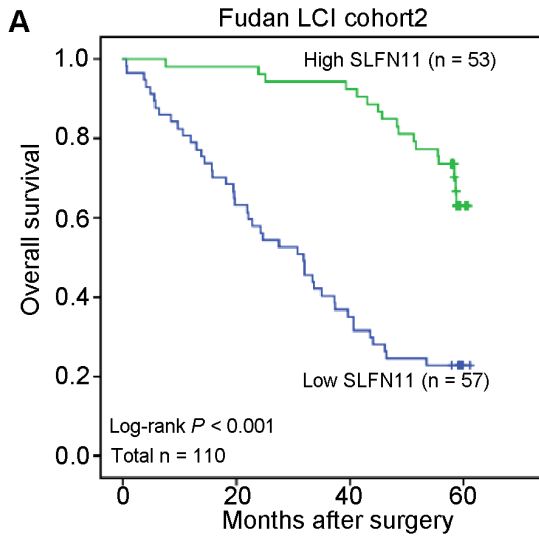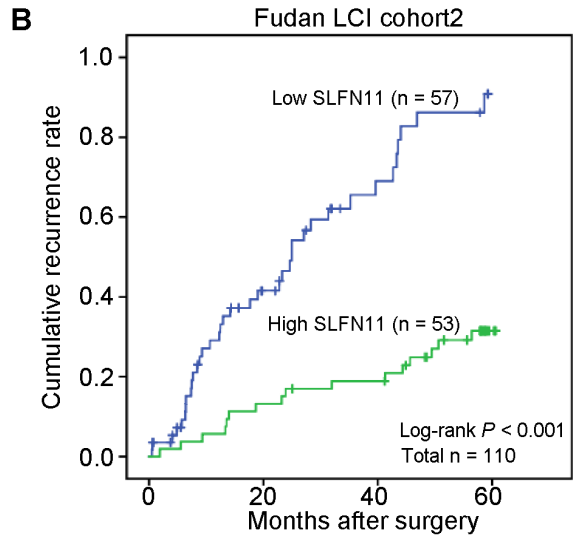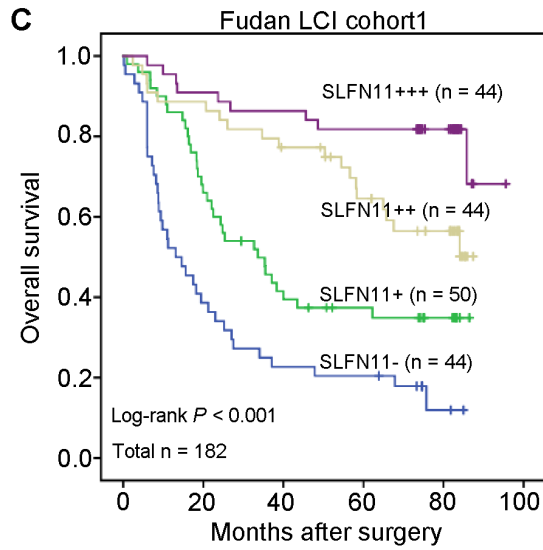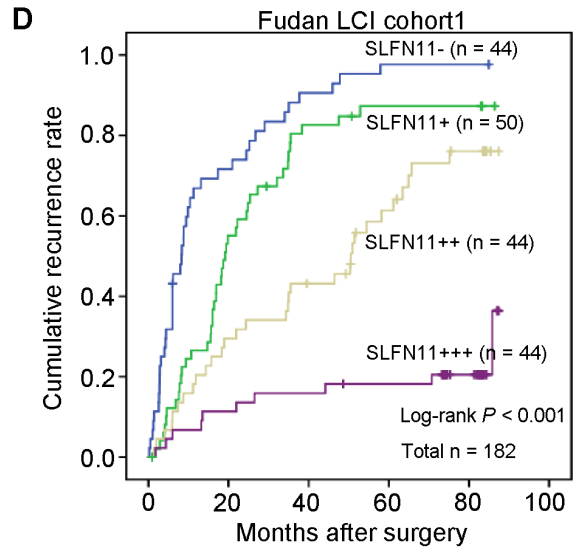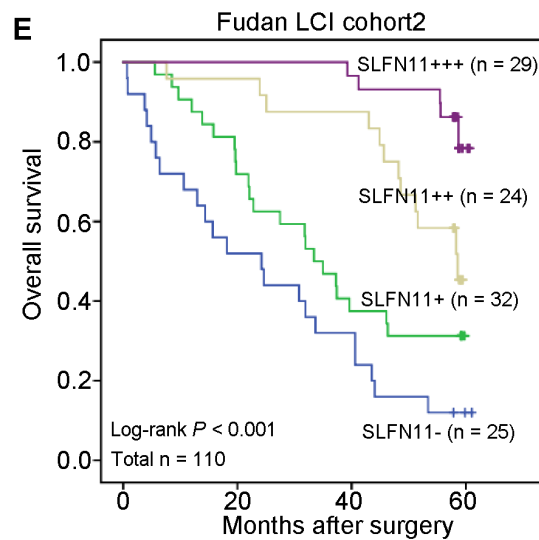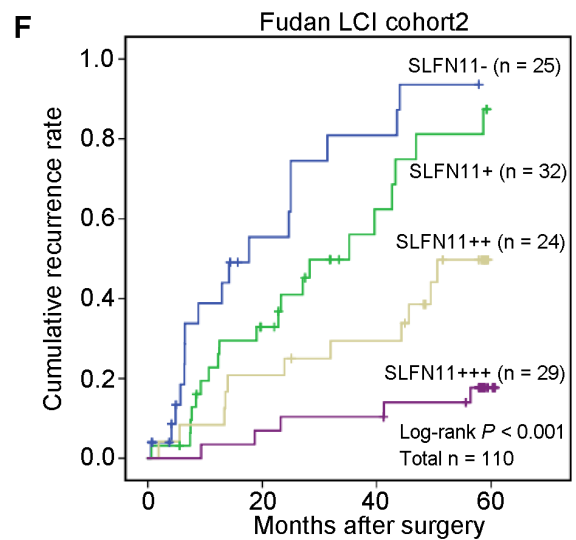

**Figure S1.** (A) Kaplan-Meier curves for overall survival based on SLFN11 expression in Fudan LCI cohort 2. (B) Kaplan-Meier curves for recurrence-free survival based on SLFN11 expression in the Fudan LCI cohort 2. (C, D) OS and recurrence probability of patients in Fudan LCI cohort 1 based on the status of SLFN11: negative (-), weak (+), moderate (++), and strong (+++). (E, F) OS and recurrence probability of patients in Fudan LCI cohort 2 based on the status of SLFN11: negative (-), weak (+), moderate (++), and strong (+++).

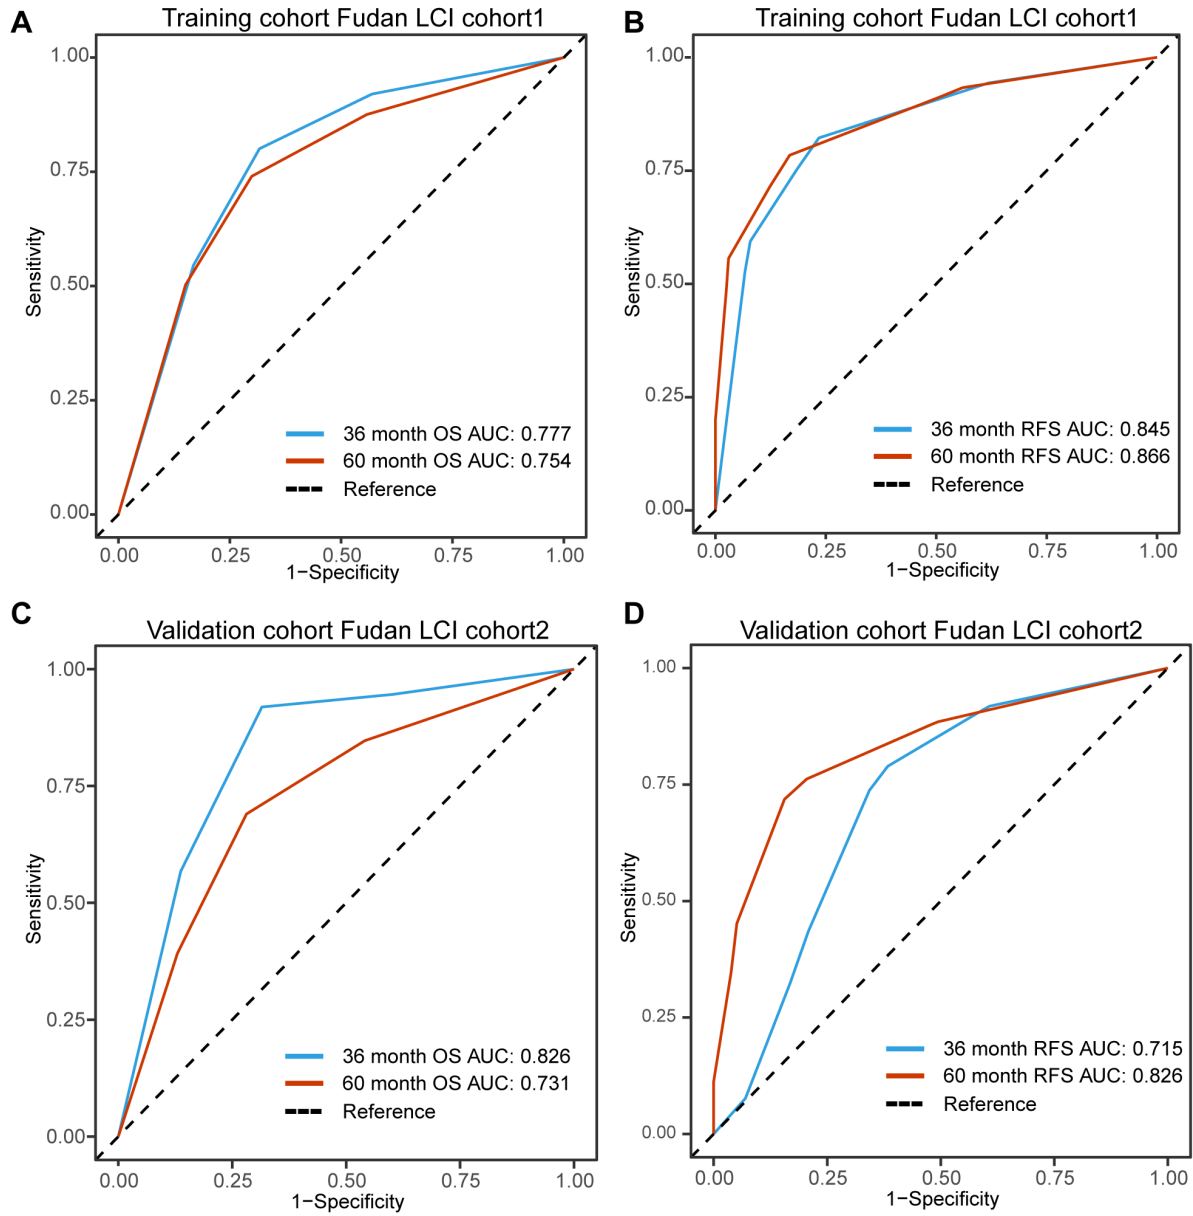

**Figure S2. Time-dependent receiver operating characteristic (ROC) analyses for the OS and RFS prediction were performed based on the multivariable models containing SLFN11 to signify the accuracy of SLFN11 expression as an adjunct for biomarker analysis. (A) OS prediction in training cohort, (B) RFS prediction in training cohort, (C) OS prediction in validation cohort, (D) RFS prediction in validation cohort.**



**Figure S3**

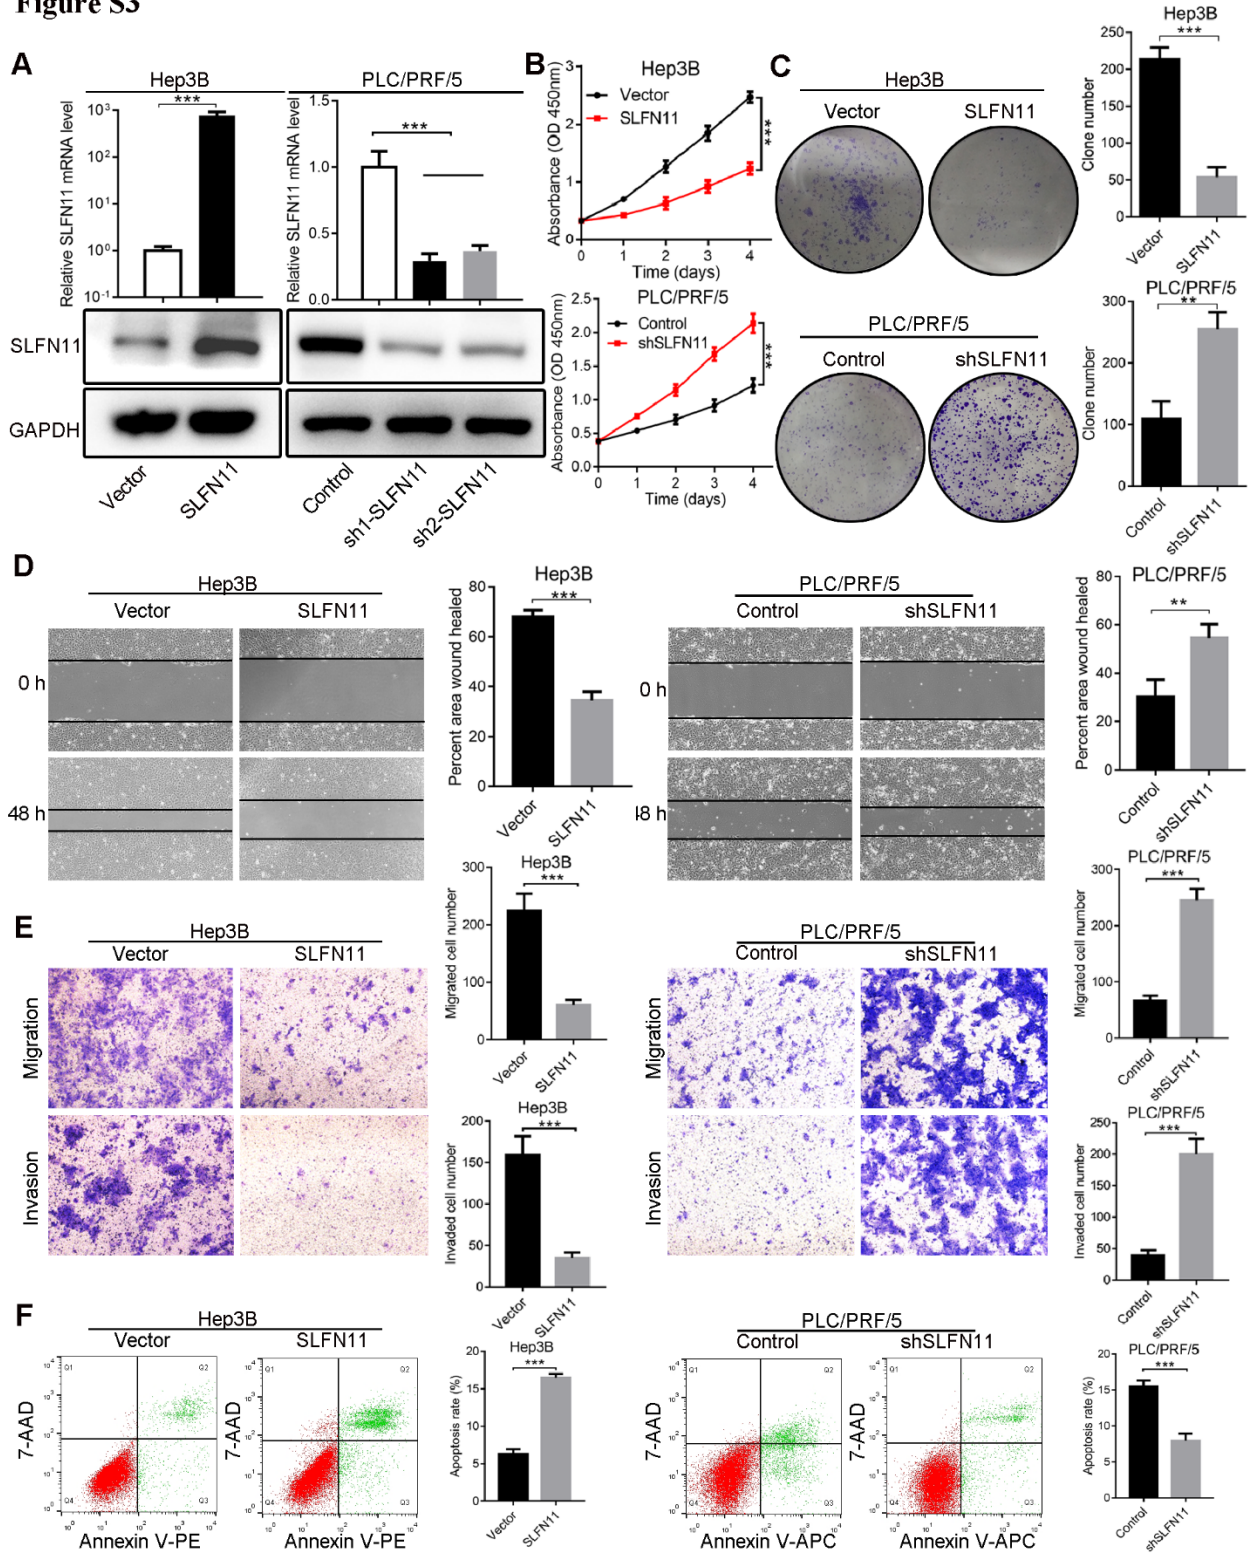

**Figure S3. SLFN11 inhibits cell proliferation, migration, and invasion and facilitates apoptosis *in vitro*. (A) Overexpression and knockdown efficiency of SLFN11 was verified by**

qRT-PCR and Western blot assays in Hep3B and PLC/PRF/5 cells. **(B)** Effects of SLFN11 overexpression and knockdown on cell proliferation by CCK-8 in Hep3B and PLC/PRF/5 cells. **(C)** Effects of SLFN11 overexpression and knockdown on cell proliferation by colony formation assays in Hep3B and PLC/PRF/5 cells. **(D)** Effects of SLFN11 overexpression and knockdown on cell migratory abilities by wound healing assays in Hep3B and PLC/PRF/5 cells. **(E)** Effects of SLFN11 overexpression and knockdown on cell migratory and invasive capacities by transwell assays in Hep3B and PLC/PRF/5 cells. **(F)** Effects of SLFN11 overexpression and knockdown on cell apoptosis by flow cytometry in Hep3B and PLC/PRF/5 cells. \*  $P < 0.05$ , \*\*  $P < 0.01$ , \*\*\*  $P < 0.001$ .

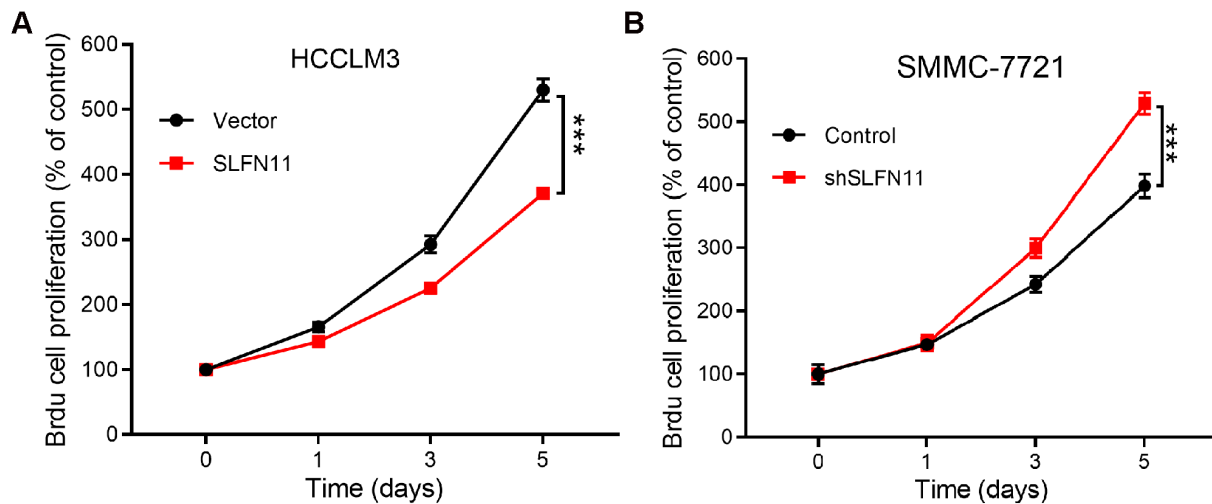

**Figure S4** The incorporated Brdu of HCCLM3 (A) and SMMC-7721 (B) cells were detected by Brdu cell proliferation assay kit for 5 days. \*\*\*  $P < 0.001$ .

**Figure S5**

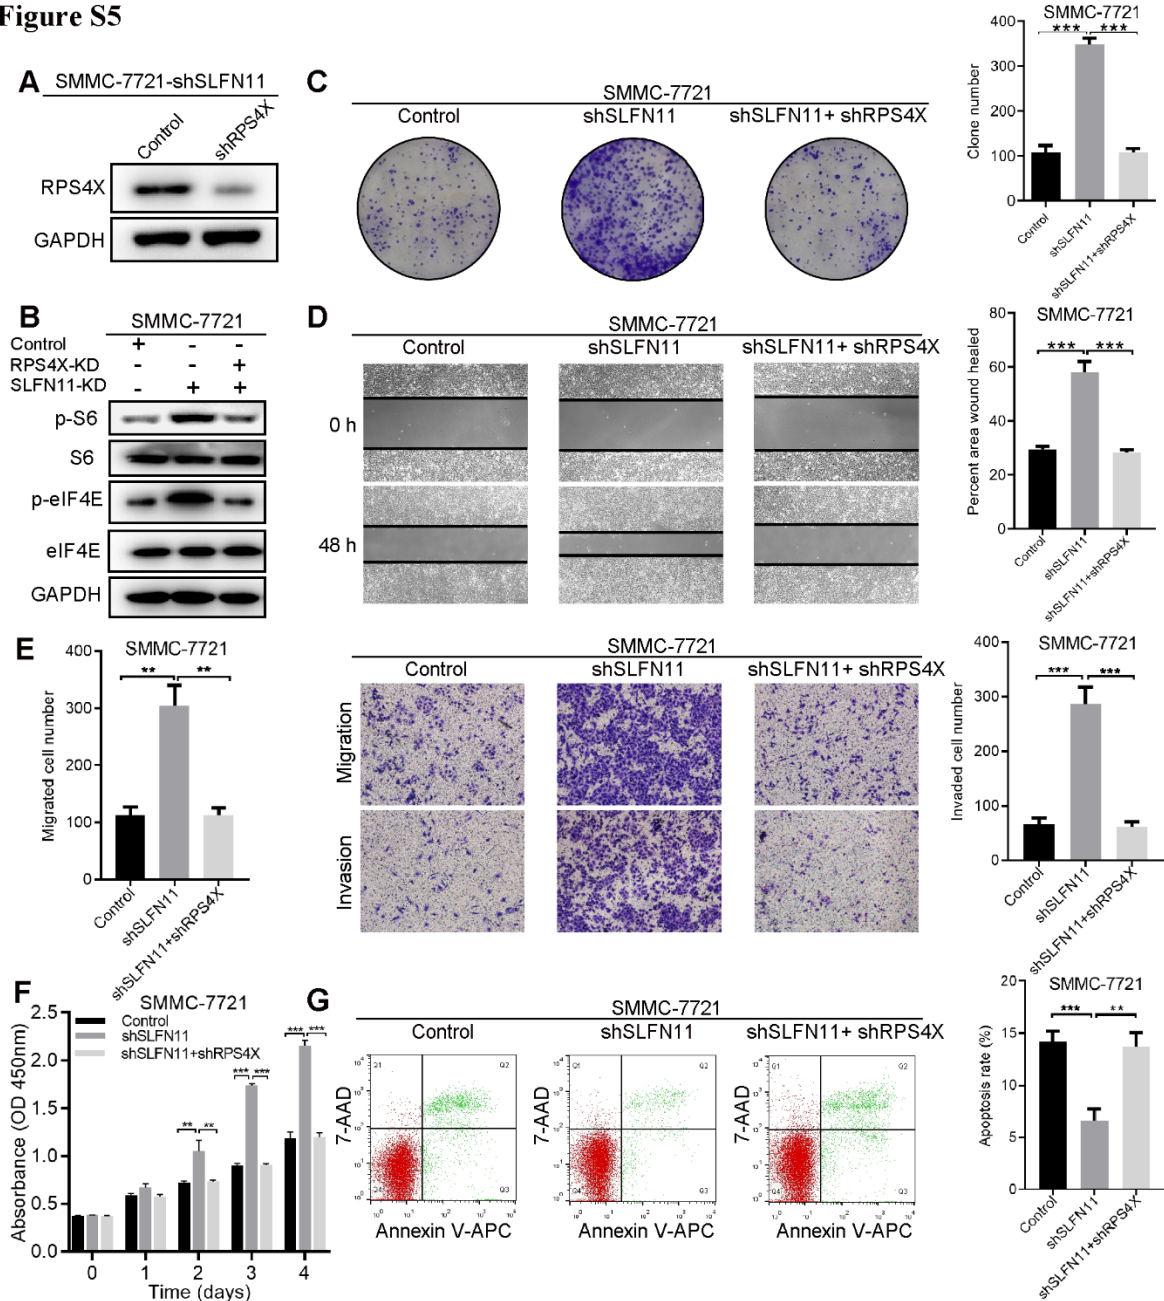

**Figure S5. SLFN11 knockdown promotes mTOR signaling pathway and HCC progression via RPS4X. (A)** Western blot analysis of the knockdown efficiency of RPS4X in SMMC-7721-shSLFN11 cells. **(B)** Western blot shows that RPS4X knockdown restored increased phosphorylation of S6 and eIF4E in SMMC-7721-shSLFN11 cells. **(C)** Colony formation assays were conducted to study the cell proliferation of SMMC-7721-Control cells and SMMC-7721-

shSLFN11 cells with or without RPS4X knockdown. **(D)** Wound healing assays were performed to detect the cell migratory abilities of SMMC-7721-Control cells and SMMC-7721-shSLFN11 cells with or without RPS4X knockdown. **(E)** Transwell assays were used to investigate the cell migratory and invasive capacities of SMMC-7721-Control cells and SMMC-7721-shSLFN11 cells with or without RPS4X knockdown. **(F)** CCK-8 assays were conducted to determine the cell proliferation of SMMC-7721-Control cells and SMMC-7721-shSLFN11 cells with or without RPS4X knockdown. **(G)** Cell apoptosis was assessed by flow cytometry in SMMC-7721-Control cells and SMMC-7721-shSLFN11 cells with or without RPS4X knockdown. \*\*  $P < 0.01$ , \*\*\*  $P < 0.001$ .

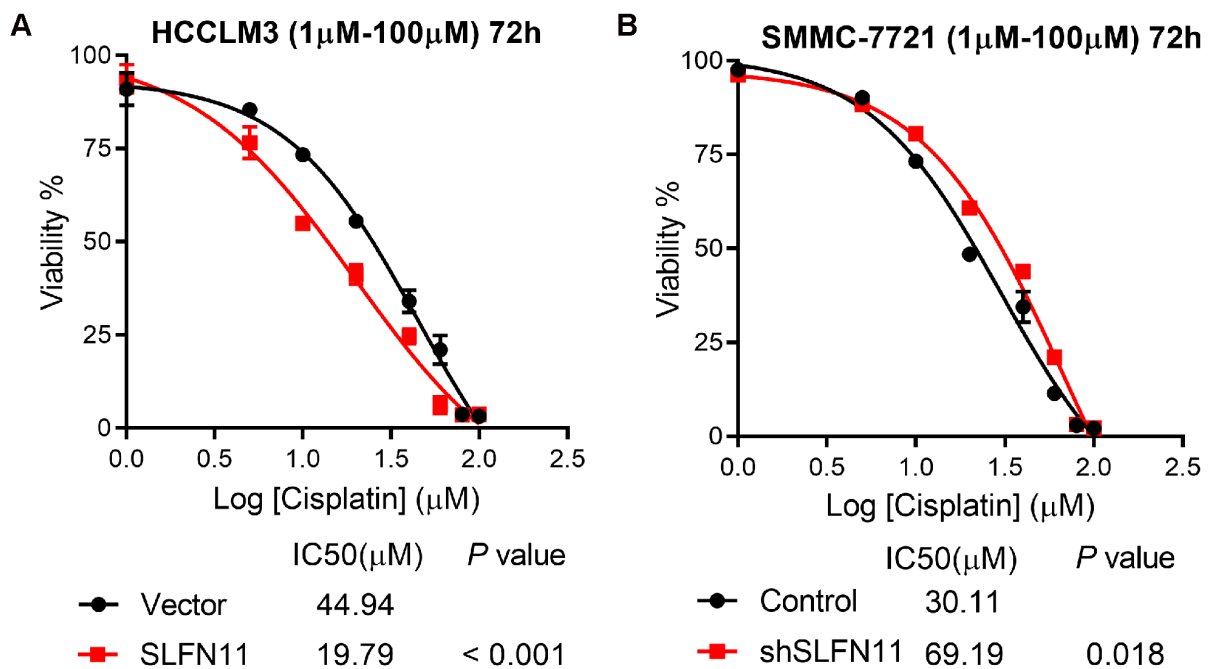

**Figure S6.** Impact of SLFN11 overexpression (A) or knockdown (B) in cisplatin chemo-resistance of HCC. Cell viability was determined by CCK-8 assay following exposure to cisplatin. The corresponding half-maximal inhibitory concentration (IC50) values and  $P$  values were also shown.

**Table S1.** Correlation between tumor SLFN11 expression and clinicopathologic characteristics in cohort 1

| Characteristics        |          | Patients   |              | Tumor SLFN11 expression |         | P value |
|------------------------|----------|------------|--------------|-------------------------|---------|---------|
|                        |          | Number (%) | Low (n = 94) | High (n = 88)           |         |         |
| Age, years             | ≤ 50     | 79 (43.4)  | 44           | 35                      | 0.371   |         |
|                        | > 50     | 103 (56.6) | 50           | 53                      |         |         |
| Gender                 | Female   | 22 (12.1)  | 11           | 11                      | 1.000   |         |
|                        | Male     | 160 (87.9) | 83           | 77                      |         |         |
| HBsAg                  | Negative | 29 (15.9)  | 14           | 15                      | 0.840   |         |
|                        | Positive | 153 (84.1) | 80           | 73                      |         |         |
| HCV                    | Negative | 178 (97.8) | 93           | 85                      | 0.355   |         |
|                        | Positive | 4 (2.2)    | 1            | 3                       |         |         |
| AFP, ng/ml             | ≤ 20     | 67 (36.8)  | 23           | 44                      | < 0.001 |         |
|                        | > 20     | 115 (63.2) | 71           | 44                      |         |         |
| CEA, ng/ml             | ≤ 5      | 167 (91.8) | 88           | 79                      | 0.423   |         |
|                        | > 5      | 15 (8.2)   | 6            | 9                       |         |         |
| CA19-9, U/ml           | ≤ 36     | 139 (76.4) | 68           | 71                      | 0.223   |         |
|                        | > 36     | 43 (23.6)  | 26           | 17                      |         |         |
| ALT, U/L               | ≤ 40     | 105 (57.7) | 54           | 51                      | 1.000   |         |
|                        | > 40     | 77 (42.3)  | 40           | 37                      |         |         |
| AST, U/L               | ≤ 37     | 128 (70.3) | 63           | 65                      | 0.334   |         |
|                        | > 37     | 54 (29.7)  | 31           | 23                      |         |         |
| γ-GT, U/L              | ≤ 54     | 74 (40.7)  | 33           | 41                      | 0.132   |         |
|                        | > 54     | 108 (59.3) | 61           | 47                      |         |         |
| Ascites                | Absent   | 173 (95.1) | 90           | 83                      | 0.741   |         |
|                        | Present  | 9 (4.9)    | 4            | 5                       |         |         |
| Tumor number           | Single   | 152 (83.5) | 77           | 75                      | 0.690   |         |
|                        | Multiple | 30 (16.5)  | 17           | 13                      |         |         |
| Tumor size, cm         | ≤ 5      | 87 (47.8)  | 35           | 52                      | 0.005   |         |
|                        | > 5      | 95 (52.2)  | 59           | 36                      |         |         |
| Tumor encapsulation    | Complete | 101 (55.5) | 49           | 52                      | 0.373   |         |
|                        | None     | 81 (44.5)  | 45           | 36                      |         |         |
| Tumor differentiation  | I-II     | 114 (62.6) | 54           | 60                      | 0.168   |         |
|                        | III-IV   | 68 (37.4)  | 40           | 28                      |         |         |
| Microvascular invasion | Absent   | 104 (57.1) | 46           | 58                      | 0.025   |         |
|                        | Present  | 78 (42.9)  | 48           | 30                      |         |         |
| BCLC stage             | 0+A      | 90 (49.5)  | 39           | 51                      | 0.038   |         |
|                        | B+C      | 92 (50.5)  | 55           | 37                      |         |         |
| TNM stage              | I-II     | 133 (73.1) | 62           | 71                      | 0.030   |         |
|                        | III+IV   | 49 (26.9)  | 32           | 17                      |         |         |

**Abbreviations:** HCC, hepatocellular carcinoma; HBsAg, hepatitis B surface antigen; HCV, hepatitis C virus;

AFP, α-fetoprotein; CEA: carcinoembryonic antigen; CA19-9: carbohydrate antigen 19-9; ALT: alanine

aminotransferase; AST: aspartate aminotransferase; γ-GT, γ-glutamyl transferase; BCLC, Barcelona Clinic Liver

Cancer; TNM, tumor-nodes-metastasis. \* P value < 0.05 was considered statistically significant. P values were

calculated using the Pearson chi-square test.

**Table S2.** Correlation between tumor SLFN11 expression and clinicopathologic characteristics in cohort 2

| Characteristics        |          | Patients   |              | Tumor SLFN11 expression |              | P value |
|------------------------|----------|------------|--------------|-------------------------|--------------|---------|
|                        |          | Number (%) | Low (n = 57) | High (n = 53)           |              |         |
| Age, years             | ≤ 50     | 34 (30.9)  | 18           | 16                      | 1.000        |         |
|                        | > 50     | 76 (69.1)  | 39           | 37                      |              |         |
| Gender                 | Female   | 12 (10.9)  | 6            | 6                       | 1.000        |         |
|                        | Male     | 98 (89.1)  | 51           | 47                      |              |         |
| HBsAg                  | Negative | 17 (15.5)  | 8            | 9                       | 0.793        |         |
|                        | Positive | 93 (84.5)  | 49           | 44                      |              |         |
| HCV                    | Negative | 108 (98.2) | 56           | 52                      | 1.000        |         |
|                        | Positive | 2 (1.8)    | 1            | 1                       |              |         |
| AFP, ng/ml             | ≤ 20     | 55 (50.0)  | 22           | 33                      | <b>0.022</b> |         |
|                        | > 20     | 55 (50.0)  | 35           | 20                      |              |         |
| CEA, ng/ml             | ≤ 5      | 98 (89.1)  | 48           | 50                      | 0.127        |         |
|                        | > 5      | 12 (10.9)  | 9            | 3                       |              |         |
| CA19-9, U/ml           | ≤ 36     | 91 (82.7)  | 41           | 50                      | <b>0.002</b> |         |
|                        | > 36     | 19 (17.3)  | 16           | 3                       |              |         |
| ALT, U/L               | ≤ 40     | 72 (65.5)  | 39           | 33                      | 0.550        |         |
|                        | > 40     | 38 (34.5)  | 18           | 20                      |              |         |
| AST, U/L               | ≤ 37     | 66 (60.0)  | 34           | 32                      | 1.000        |         |
|                        | > 37     | 44 (40.0)  | 23           | 21                      |              |         |
| γ-GT, U/L              | ≤ 54     | 60 (54.5)  | 31           | 29                      | 1.000        |         |
|                        | > 54     | 50 (45.5)  | 26           | 24                      |              |         |
| Ascites                | Absent   | 102 (92.7) | 52           | 50                      | 0.718        |         |
|                        | Present  | 8 (7.3)    | 5            | 3                       |              |         |
| Tumor number           | Single   | 89 (80.9)  | 43           | 46                      | 0.151        |         |
|                        | Multiple | 21 (19.1)  | 14           | 7                       |              |         |
| Tumor size, cm         | ≤ 5      | 57 (51.8)  | 26           | 31                      | 0.188        |         |
|                        | > 5      | 53 (48.2)  | 31           | 22                      |              |         |
| Tumor encapsulation    | Complete | 74 (67.3)  | 38           | 36                      | 1.000        |         |
|                        | None     | 36 (32.7)  | 19           | 17                      |              |         |
| Tumor differentiation  | I-II     | 66 (60.0)  | 31           | 35                      | 0.246        |         |
|                        | III-IV   | 44 (40.0)  | 26           | 18                      |              |         |
| Microvascular invasion | Absent   | 72 (65.5)  | 32           | 40                      | <b>0.045</b> |         |
|                        | Present  | 38 (34.5)  | 25           | 13                      |              |         |
| BCLC stage             | 0+A      | 59 (53.6)  | 24           | 35                      | <b>0.014</b> |         |
|                        | B+C      | 51 (46.4)  | 33           | 18                      |              |         |
| TNM stage              | I+II     | 88 (80.0)  | 41           | 47                      | <b>0.033</b> |         |
|                        | III+IV   | 22 (20.0)  | 16           | 6                       |              |         |

**Abbreviations:** HCC, hepatocellular carcinoma; HBsAg, hepatitis B surface antigen; HCV, hepatitis C virus;

AFP, α-fetoprotein; CEA: carcinoembryonic antigen; CA19-9: carbohydrate antigen 19-9; ALT: alanine aminotransferase; AST: aspartate aminotransferase; γ-GT, γ-glutamyl transferase; BCLC, Barcelona Clinic Liver

Cancer; TNM, tumor-nodes-metastasis. \* *P* value < 0.05 was considered statistically significant. *P* values were calculated using the Pearson chi-square test.

**Table S3.** Univariate and multivariate analysis of factors associated with survival and recurrence in cohort 1

| Variables                                   | OS                |                            |                   | RFS               |                            |                   |
|---------------------------------------------|-------------------|----------------------------|-------------------|-------------------|----------------------------|-------------------|
|                                             | Univariate        | Multivariate               |                   | Univariate        | Multivariate               |                   |
|                                             | <i>P</i>          | HR (95% CI)                | <i>P</i>          | <i>P</i>          | HR (95% CI)                | <i>P</i>          |
| Age, years (> 50 vs. ≤ 50)                  | 0.545             |                            | NA                | 0.982             |                            | NA                |
| Gender (male vs. female)                    | 0.335             |                            | NA                | 0.089             |                            | NA                |
| HBsAg (positive vs. negative)               | 0.266             |                            | NA                | 0.479             |                            | NA                |
| AFP, ng/ml (> 20 vs. ≤ 20)                  | <b>0.003</b>      |                            | NS                | <b>0.002</b>      |                            | NS                |
| CEA, ng/ml (> 5 vs. ≤ 5)                    | 0.388             |                            | NA                | 0.193             |                            | NA                |
| CA19-9, U/ml (> 36 vs. ≤ 36)                | <b>0.039</b>      |                            | NS                | <b>0.002</b>      |                            | NS                |
| ALT, U/L (> 40 vs. ≤ 40)                    | 0.369             |                            | NA                | 0.052             |                            | NA                |
| AST, U/L (> 37 vs. ≤ 37)                    | <b>0.006</b>      |                            | NS                | <b>0.015</b>      |                            | NS                |
| γ-GT, U/L (> 54 vs. ≤ 54)                   | <b>0.001</b>      |                            | NS                | <b>&lt; 0.001</b> | <b>1.712 (1.132-2.590)</b> | <b>0.011</b>      |
| Ascites (present vs. absent)                | 0.118             |                            | NA                | <b>0.043</b>      |                            | NS                |
| Tumor number (multiple vs. single)          | 0.728             |                            | NA                | 0.251             |                            | NA                |
| Tumor size, cm (> 5 vs. ≤ 5)                | <b>&lt; 0.001</b> | <b>1.682 (1.072-2.638)</b> | <b>0.024</b>      | <b>&lt; 0.001</b> |                            | NS                |
| Tumor encapsulation (complete vs. none)     | 0.070             |                            | NA                | 0.076             |                            | NA                |
| Tumor differentiation (III–IV vs. I–II)     | <b>0.023</b>      |                            | NS                | 0.062             |                            | NA                |
| Microvascular invasion (present vs. absent) | <b>0.019</b>      |                            | NS                | 0.080             |                            | NA                |
| BCLC stage (B+C vs. 0+A)                    | 0.171             |                            | NA                | 0.237             |                            | NA                |
| TNM stage (III+IV vs. I+II)                 | <b>&lt; 0.001</b> |                            | NS                | <b>&lt; 0.001</b> | <b>1.552 (1.037-2.324)</b> | <b>0.033</b>      |
| SLFN11 (Low vs. High)                       | <b>&lt; 0.001</b> | <b>3.142 (1.957-5.045)</b> | <b>&lt; 0.001</b> | <b>&lt; 0.001</b> | <b>3.659 (2.414-5.547)</b> | <b>&lt; 0.001</b> |
| Subgroup analyses (SLFN11+++ as referent)   |                   |                            |                   |                   |                            |                   |

|                         |         |                      |         |         |                       |         |
|-------------------------|---------|----------------------|---------|---------|-----------------------|---------|
| SLFN11 - vs. SLFN11+++  | < 0.001 | 8.218 (3.892-17.354) | < 0.001 | < 0.001 | 16.305 (7.982-33.305) | < 0.001 |
| SLFN11 + vs. SLFN11+++  | < 0.001 | 4.294 (2.012-9.162)  | < 0.001 | < 0.001 | 8.475 (4.189-17.146)  | < 0.001 |
| SLFN11 ++ vs. SLFN11+++ | 0.030   | 2.279 (1.021-5.090)  | 0.044   | < 0.001 | 4.516 (2.203-9.259)   | < 0.001 |

---

**Abbreviations:** OS, overall survival; RFS recurrence-free survival; HBsAg, hepatitis B surface antigen; AFP:  $\alpha$ -fetoprotein; CEA: carcinoembryonic antigen; CA19-9: carbohydrate antigen 19-9; ALT: alanine aminotransferase; AST: aspartate aminotransferase;  $\gamma$ -GT,  $\gamma$ -glutamyl transferase; HR, hazard ratio; CI, confidential interval; NA, not adopted; NS, not significant. Data obtained from the Cox proportional hazards model; *P* value < 0.05 was regarded as statistically significant.



**Table S4.** Univariate and multivariate analysis of factors associated with survival and recurrence in cohort 2.

| Variables                                   | OS                |                            |                   | RFS               |                            |                   |
|---------------------------------------------|-------------------|----------------------------|-------------------|-------------------|----------------------------|-------------------|
|                                             | Univariate        | Multivariate               |                   | Univariate        | Multivariate               |                   |
|                                             | <i>P</i>          | HR (95% CI)                | <i>P</i>          | <i>P</i>          | HR (95% CI)                | <i>P</i>          |
| Age, years (> 50 vs. ≤ 50)                  | 0.851             |                            | NA                | 0.412             |                            | NA                |
| Gender (male vs. female)                    | 0.353             |                            | NA                | 0.349             |                            | NA                |
| HBsAg (positive vs. negative)               | 0.809             |                            | NA                | 0.673             |                            | NA                |
| AFP, ng/ml (> 20 vs. ≤ 20)                  | <b>0.011</b>      |                            | NS                | <b>0.031</b>      |                            | NS                |
| CEA, ng/ml (> 5 vs. ≤ 5)                    | 0.825             |                            | NA                | 0.394             |                            | NA                |
| CA19-9, U/ml (> 36 vs. ≤ 36)                | <b>0.002</b>      | <b>2.856 (1.364-5.980)</b> | <b>0.005</b>      | 0.109             |                            | NA                |
| ALT, U/L (> 40 vs. ≤ 40)                    | <b>0.019</b>      | <b>2.864 (1.460-5.618)</b> | <b>0.002</b>      | 0.530             |                            | NA                |
| AST, U/L (> 37 vs. ≤ 37)                    | 0.499             |                            | NA                | 0.333             |                            | NA                |
| γ-GT, U/L (> 54 vs. ≤ 54)                   | 0.713             |                            | NA                | 0.786             |                            | NA                |
| Ascites (present vs. absent)                | 0.353             |                            | NA                | 0.965             |                            | NA                |
| Tumor number (multiple vs. single)          | 0.057             |                            | NA                | 0.299             |                            | NA                |
| Tumor size, cm (> 5 vs. ≤ 5)                | 0.114             |                            | NA                | 0.395             |                            | NA                |
| Tumor encapsulation (complete vs. none)     | 0.125             |                            | NA                | 0.665             |                            | NA                |
| Tumor differentiation (III–IV vs. I–II)     | 0.976             |                            | NA                | 0.222             |                            | NA                |
| Microvascular invasion (present vs. absent) | 0.134             |                            | NA                | <b>0.024</b>      |                            | NS                |
| BCLC stage (B+C vs. 0+A)                    | <b>0.037</b>      |                            | NS                | 0.106             |                            | NA                |
| TNM stage (III+IV vs. I+II)                 | <b>0.003</b>      |                            | NS                | 0.853             |                            | NA                |
| SLFN11 (Low vs. High)                       | <b>&lt; 0.001</b> | <b>3.924 (2.169-7.099)</b> | <b>&lt; 0.001</b> | <b>&lt; 0.001</b> | <b>4.977 (2.639-9.388)</b> | <b>&lt; 0.001</b> |
| Subgroup analyses (SLFN11+++ as referent)   |                   |                            |                   |                   |                            |                   |

|                         |         |                       |         |         |                       |         |
|-------------------------|---------|-----------------------|---------|---------|-----------------------|---------|
| SLFN11 - vs. SLFN11+++  | < 0.001 | 14.384 (5.197-39.813) | < 0.001 | < 0.001 | 14.545 (5.148-41.091) | < 0.001 |
| SLFN11 + vs. SLFN11+++  | < 0.001 | 5.753 (2.094-15.807)  | 0.001   | < 0.001 | 7.685 (2.755-21.440)  | < 0.001 |
| SLFN11 ++ vs. SLFN11+++ | 0.023   | 4.156 (1.424-12.125)  | 0.009   | 0.022   | 3.287 (1.127-9.591)   | 0.029   |

---

**Abbreviations:** OS, overall survival; RFS recurrence-free survival; HBsAg, hepatitis B surface antigen; AFP:  $\alpha$ -fetoprotein; CEA: carcinoembryonic antigen; CA19-9: carbohydrate antigen 19-9; ALT: alanine aminotransferase; AST: aspartate aminotransferase;  $\gamma$ -GT,  $\gamma$ -glutamyl transferase; HR, hazard ratio; CI, confidential interval; NA, not adopted; NS, not significant. Data obtained from the Cox proportional hazards model; *P* value < 0.05 was regarded as statistically significant.

**Table S5.** The list of 84 unique proteins that interact with SLFN11 by LC-MS/MS analyses.

| <b>Entry name</b> | <b>Description</b>                                       | <b>Protein score</b> |
|-------------------|----------------------------------------------------------|----------------------|
| IGKV2-30          | Immunoglobulin kappa variable 2-30                       | 835                  |
| SLFN11            | Schlafen family member 11                                | 304                  |
| KRT6B             | Keratin, type II cytoskeletal 6B                         | 211                  |
| HNRNPU            | Heterogeneous nuclear ribonucleoprotein U                | 196                  |
| DHX9              | ATP-dependent RNA helicase A                             | 133                  |
| RPL13             | 60S ribosomal protein L13                                | 122                  |
| RBM10             | RNA-binding protein 10                                   | 73                   |
| PRPF31            | U4/U6 small nuclear ribonucleoprotein Prp31              | 65                   |
| PGAM5             | Serine/threonine-protein phosphatase PGAM5,mitochondrial | 64                   |
| TXN               | Thioredoxin                                              | 58                   |
| RPL15             | 60S ribosomal protein L15                                | 56                   |
| USP15             | Ubiquitin carboxyl-terminal hydrolase 15                 | 54                   |
| SPTAN1            | Spectrin alpha chain, non-erythrocytic 1                 | 53                   |
| RPL14             | 60S ribosomal protein L14                                | 49                   |
| KRT75             | Keratin, type II cytoskeletal 75                         | 49                   |
| MATR3             | Matrin-3                                                 | 48                   |
| RPL31             | 60S ribosomal protein L31                                | 46                   |
| MRPL37            | 39S ribosomal protein L37, mitochondrial                 | 46                   |
| STK38L            | Serine/threonine-protein kinase 38-like                  | 46                   |
| EPRS              | Bifunctional glutamate/proline--tRNA ligase              | 44                   |
| EXOSC3            | Exosome complex component RRP40                          | 43                   |
| PEX6              | Peroxisome assembly factor 2                             | 43                   |
| RPS3A             | 40S ribosomal protein S3a                                | 43                   |
| HNRNPA2B1         | Heterogeneous nuclear ribonucleoproteins A2/B1           | 42                   |
| ALYREF            | THO complex subunit 4                                    | 41                   |
| MRPL58            | Peptidyl-tRNA hydrolase ICT1, mitochondrial              | 40                   |
| EFTUD2            | 116 kDa U5 small nuclear ribonucleoprotein component     | 39                   |
| MRPL2             | 39S ribosomal protein L2, mitochondrial                  | 39                   |
| RPS11             | 40S ribosomal protein S11                                | 38                   |
| MRPL45            | 39S ribosomal protein L45, mitochondrial                 | 38                   |
| RPS4X             | 40S ribosomal protein S4, X isoform                      | 37                   |
| SLC25A3           | Phosphate carrier protein, mitochondrial                 | 37                   |
| LCN1P1            | Putative lipocalin 1-like protein 1                      | 37                   |
| MRPL15            | 39S ribosomal protein L15, mitochondrial                 | 37                   |
| RPL7A             | 60S ribosomal protein L7a                                | 36                   |
| PPM1B             | Protein phosphatase 1B                                   | 36                   |
| DHX30             | Putative ATP-dependent RNA helicase DHX30                | 35                   |
| IGKV4-1           | Immunoglobulin kappa variable 4-1                        | 35                   |
| NONO              | Non-POU domain-containing octamer-binding protein        | 34                   |
| FMR1              | Synaptic functional regulator FMR1                       | 33                   |
| MRPL19            | 39S ribosomal protein L19, mitochondrial                 | 33                   |
| MRPL43            | 39S ribosomal protein L43, mitochondrial                 | 33                   |
| SNRPD2            | Small nuclear ribonucleoprotein Sm D2                    | 32                   |
| SBNO2             | Protein strawberry notch homolog 2                       | 32                   |
| KCTD7             | BTB/POZ domain-containing protein KCTD7                  | 32                   |
| ELAVL1            | ELAV-like protein 1                                      | 32                   |
| NAT10             | RNA cytidine acetyltransferase                           | 31                   |
| RPS25             | 40S ribosomal protein S25                                | 31                   |
| TAF4              | Transcription initiation factor TFIID subunit 4          | 30                   |
| DDX5              | Probable ATP-dependent RNA helicase DDX5                 | 30                   |

|          |                                                                      |    |
|----------|----------------------------------------------------------------------|----|
| STRN4    | Striatin-4                                                           | 30 |
| SLC25A5  | ADP/ATP translocase 2                                                | 30 |
| ATP5A1   | ATP synthase subunit alpha, mitochondrial                            | 29 |
| RPS19    | 40S ribosomal protein S19                                            | 29 |
| NOP2     | Probable 28S rRNA (cytosine(4447)-C(5))-methyltransferase            | 29 |
| CLNS1A   | Methylosome subunit pICln                                            | 28 |
| FAM196A  | Protein FAM196A                                                      | 27 |
| OTUD4    | OTU domain-containing protein 4                                      | 27 |
| RPL3     | 60S ribosomal protein L3                                             | 27 |
| SRSF4    | Serine/arginine-rich splicing factor 4                               | 27 |
| THEMIS   | Protein THEMIS                                                       | 27 |
| CABP4    | Calcium-binding protein 4                                            | 27 |
| STK17A   | Serine/threonine-protein kinase 17A                                  | 26 |
| MRPL9    | 39S ribosomal protein L9, mitochondrial                              | 26 |
| TOP2A    | DNA topoisomerase 2-alpha                                            | 26 |
| RUVBL2   | RuvB-like 2                                                          | 26 |
| URAD     | Putative 2-oxo-4-hydroxy-4-carboxy-5-ureidoimidazoline decarboxylase | 25 |
| SPATA7   | Spermatogenesis-associated protein 7                                 | 25 |
| LAMA1    | Laminin subunit alpha-1                                              | 25 |
| TGM2     | Protein-glutamine gamma-glutamyltransferase 2                        | 25 |
| SMARCA1  | Probable global transcription activator SNF2L1                       | 24 |
| PCLO     | Protein piccolo                                                      | 24 |
| PEX10    | Peroxisome biogenesis factor 10                                      | 24 |
| HIST1H1E | Histone H1.4                                                         | 23 |
| TRIM29   | Tripartite motif-containing protein 29                               | 23 |
| MRPL13   | 39S ribosomal protein L13, mitochondrial                             | 23 |
| PRPF19   | Pre-mRNA-processing factor 19                                        | 22 |
| HIST1H1B | Histone H1.5                                                         | 22 |
| RPL30    | 60S ribosomal protein L30                                            | 21 |
| RPL27    | 60S ribosomal protein L27                                            | 21 |
| HNRNPH1  | Heterogeneous nuclear ribonucleoprotein H                            | 21 |
| MRPL53   | 39S ribosomal protein L53, mitochondrial                             | 20 |
| ARHGEF17 | Rho guanine nucleotide exchange factor 17                            | 20 |
| RBM15    | Putative RNA-binding protein 15                                      | 20 |

---
